# Supplementary material for: Selective degradation of acetaminophen from hydrolyzed urine by peroxymonosulfate alone: performances and mechanisms
Source: Royal Society of Chemistry journal article supplement (doi:10.1039/d1ra07891g), 2021-01-01
Supplement: d1ra07891g1.pdf [file d1ra07891g1.pdf]

## Supplementary material

### Selective degradation of acetaminophen from hydrolyzed urine by peroxymonosulfate alone: performances and mechanisms

Yiting Lin<sup>a</sup>, Xiting Mo<sup>a</sup>, Yamin Zhang<sup>a</sup>, Minghua Nie<sup>a,b\*</sup>, Caixia Yan<sup>a\*</sup>, Leliang Wu<sup>a</sup>

<sup>a</sup> School of Geography and Environment, Key Laboratory of Poyang Lake Wetland and Watershed  
Research, Ministry of Education, Jiangxi Normal University, Nanchang 330022, China

<sup>b</sup> Key Laboratory of Eco-geochemistry, Ministry of Natural Resource, Beijing 100037, China

Corresponding author email: [mhnie@jxnu.edu.cn](mailto:mhnie@jxnu.edu.cn) (M. Nie); [yancaixia@jxnu.edu.cn](mailto:yancaixia@jxnu.edu.cn) (C. Yan)

Table S1. Composition of FU and HU matrices.

| Species                                             | MW (g•mol <sup>-1</sup> ) | Concentration (mM•L <sup>-1</sup> ) |      |
|-----------------------------------------------------|---------------------------|-------------------------------------|------|
|                                                     |                           | FU                                  | HU   |
| Urea                                                | 60.6                      | 250                                 | -    |
| NaCl                                                | 58.44                     | 44                                  | 60   |
| Na <sub>2</sub> SO <sub>4</sub>                     | 142.04                    | 15                                  | 15   |
| KCl                                                 | 74.55                     | 40                                  | 40   |
| NH <sub>4</sub> OH                                  | 35.04                     | -                                   | 250  |
| MgCl <sub>2</sub> •6H <sub>2</sub> O                | 203.31                    | 4                                   | -    |
| NaH <sub>2</sub> PO <sub>4</sub> •2H <sub>2</sub> O | 156.01                    | 20                                  | 13.6 |
| CaCl <sub>2</sub>                                   | 110.98                    | 4                                   | -    |
| NH <sub>4</sub> HCO <sub>3</sub>                    | 79.06                     | -                                   | 250  |
| Creatinine                                          | 113.12                    | -                                   | 7.4  |
| Creatine                                            | 149.15                    | -                                   | 1.38 |
| Hippuric acid                                       | 179.17                    | -                                   | 0.16 |
| Na <sub>3</sub> Citrate•2H <sub>2</sub> O           | 249.1                     | 2.7                                 | -    |
| pH                                                  | -                         | 6                                   | 9    |

Table S2. The details HPLC parameters for the analysis of target organic compounds.

| Target organic compound | Test wavelength (nm) | Eluent                                                         | Flow rate (mL•min <sup>-1</sup> ) |
|-------------------------|----------------------|----------------------------------------------------------------|-----------------------------------|
| ACE                     | 286                  | 10/90 (v/v) acetonitrile/water with 0.05% trifluoroacetic acid | 0.15                              |
| FFA                     | 214                  | 10/90 (v/v) methanol/water with 0.05% trifluoroacetic acid     | 0.2                               |
| NB                      | 262                  | 10/60 (v/v) water/methanol                                     | 0.2                               |

Table S3. The details LC-MS solvents parameters for the analysis of the ACE intermediate products.

| Time (min) | Solvent B | Flow rate<br>(mL•min <sup>-1</sup> ) |
|------------|-----------|--------------------------------------|
| 0.00       | 7.0       | 0.35                                 |
| 2.00       | 7.0       | 0.35                                 |
| 8.50       | 93.0      | 0.35                                 |
| 11.50      | 93.0      | 0.35                                 |
| 11.51      | 7.0       | 0.35                                 |
| 15.00      | 7.0       | 0.35                                 |

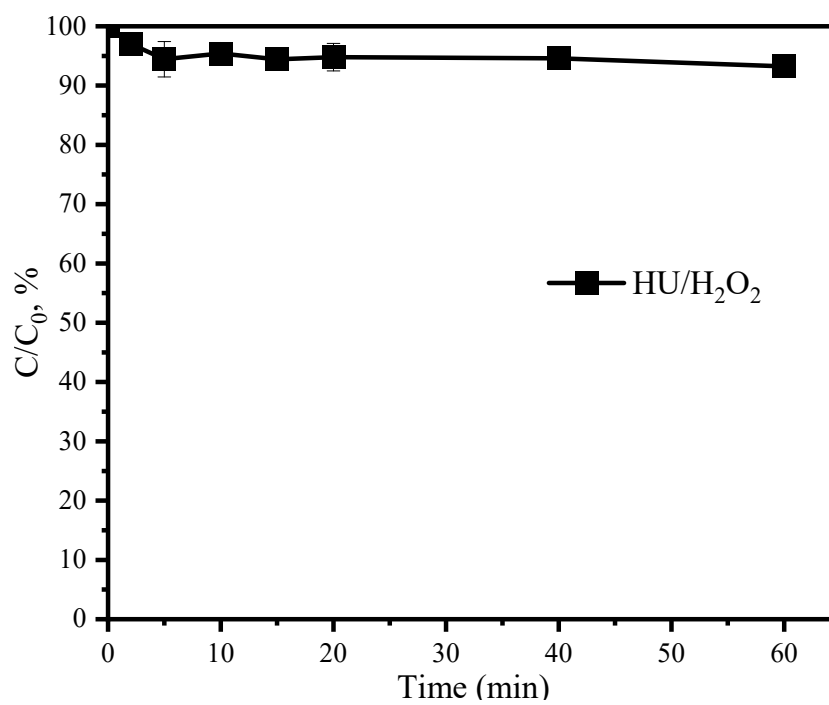

Fig. S1 Degradation of ACE in the system of HU/H<sub>2</sub>O<sub>2</sub>. Experiment conditions: [H<sub>2</sub>O<sub>2</sub>]<sub>0</sub> = 3 mM; [ACE]<sub>0</sub> = 5 μM.

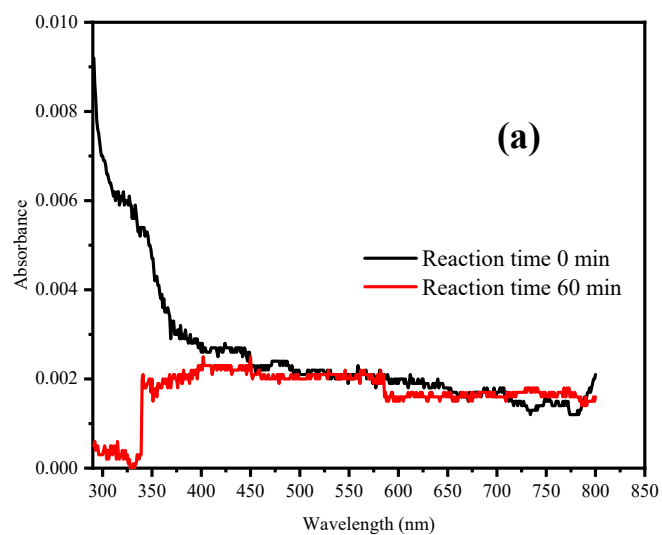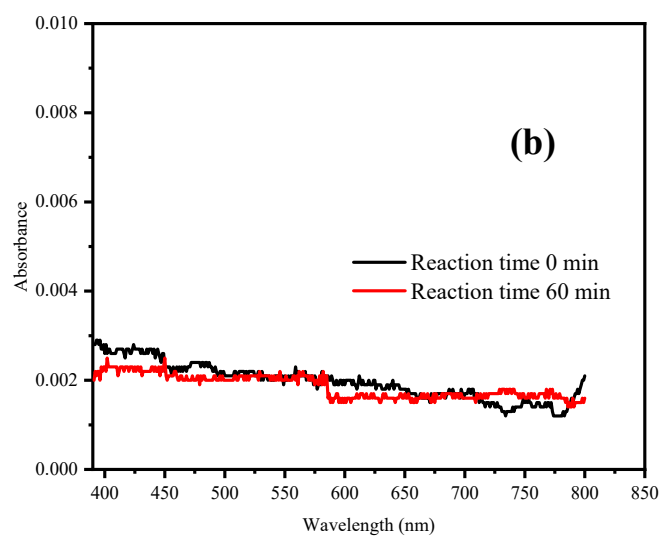

Fig. S2 The variation of absorbance of the HU/PMS system during predetermined reaction time.

$[PMS]_0 = 3 \text{ mM}$ ;  $[ACE]_0 = 5 \text{ }\mu\text{M}$ ; (a) [wavelength] = 291-810 nm; (b) [wavelength] = 391-810 nm.
